# Supplementary material
Source: PubMed Central journal article supplement (PMC6012516)
Supplement: jciinsight-3-120365-s126.pdf [file jciinsight-3-120365-s126.pdf]

A

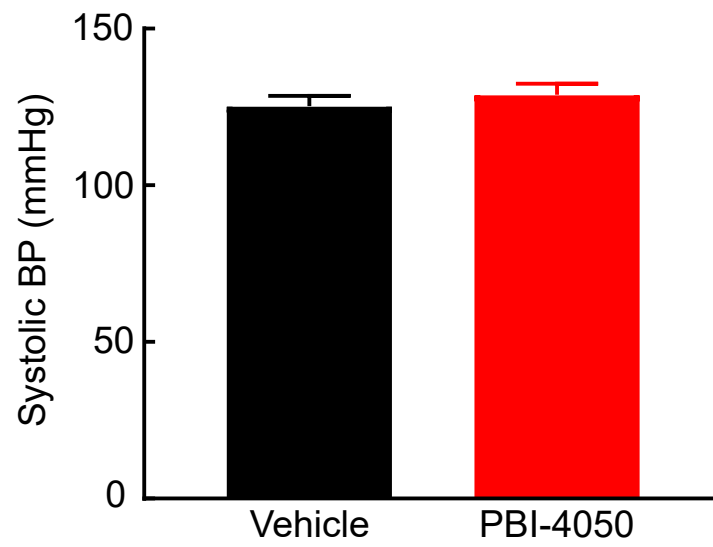

B

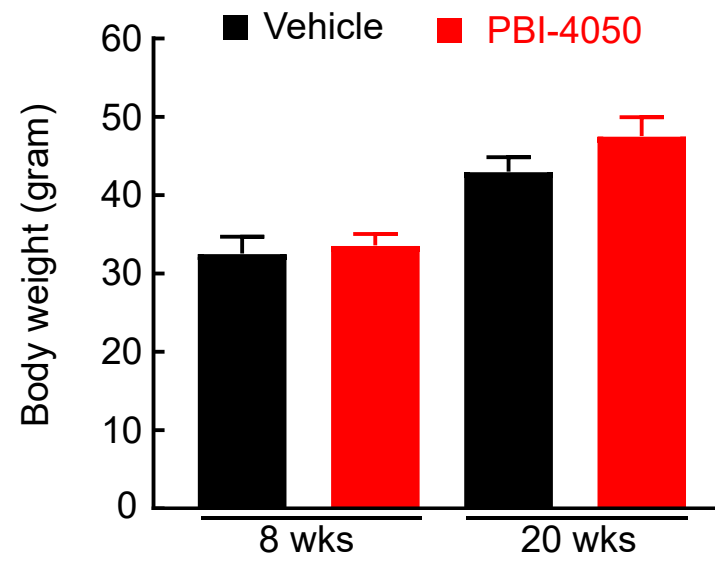

Supplemental Figure S1

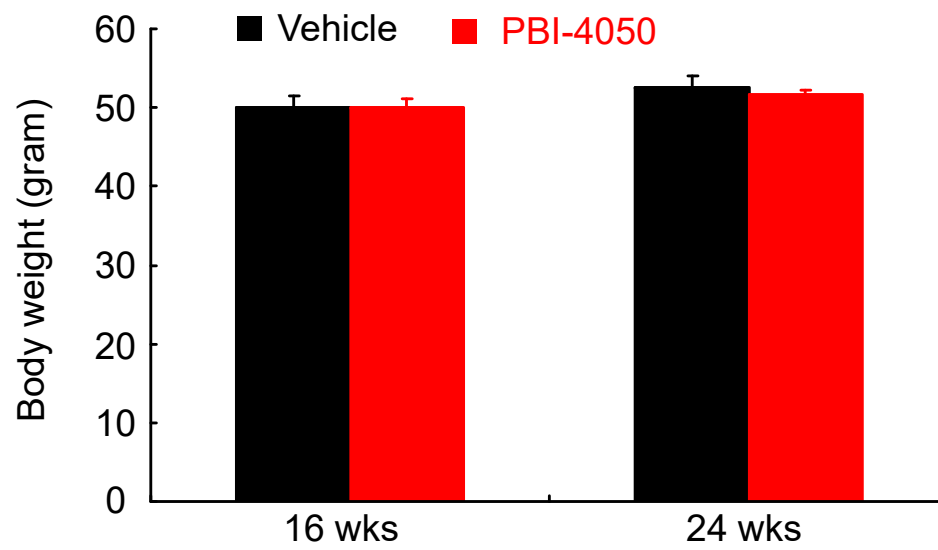

Supplemental Figure S2

Vehicle

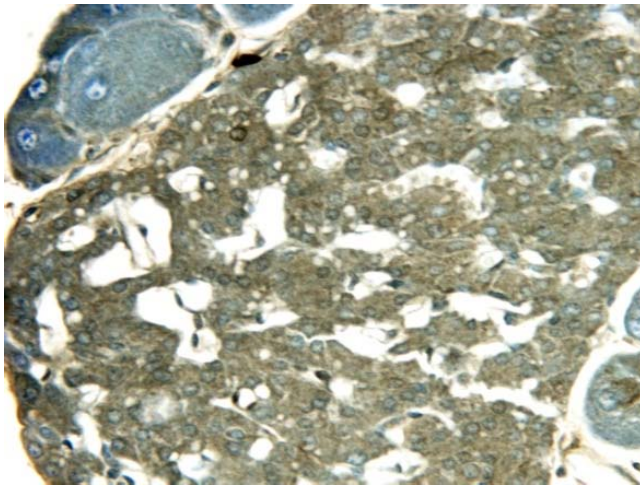

PBI-4050

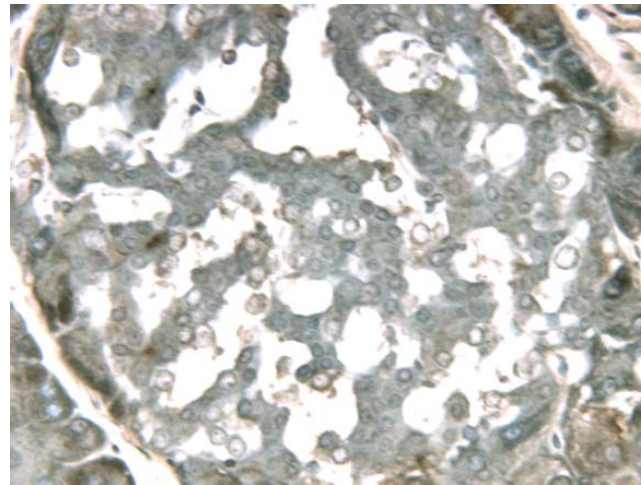

CHOP: C/EBP homologous protein plays an important role in ER stress induced apoptosis, x250.

Supplemental Figure S3

Vehicle

PBI-4050

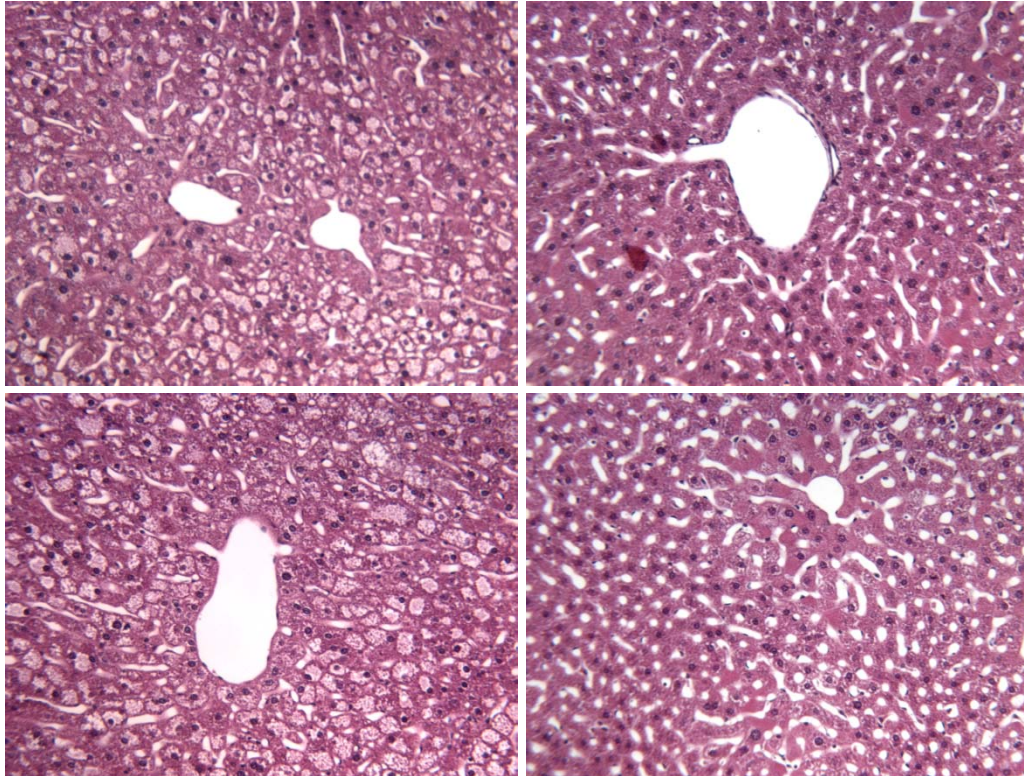

H&E staining: x100.

Supplemental Figure S4
